# Supplementary material for: Dynamic viscosity of methane hydrate systems from non-Einsteinian, plasma-functionalized carbon nanotube nanofluids
Source: Royal Society of Chemistry journal article supplement (doi:10.1039/d2nr02712g), 2022-01-01
Supplement: d2nr02712g1.pdf [file d2nr02712g1.pdf]

APPENDIX

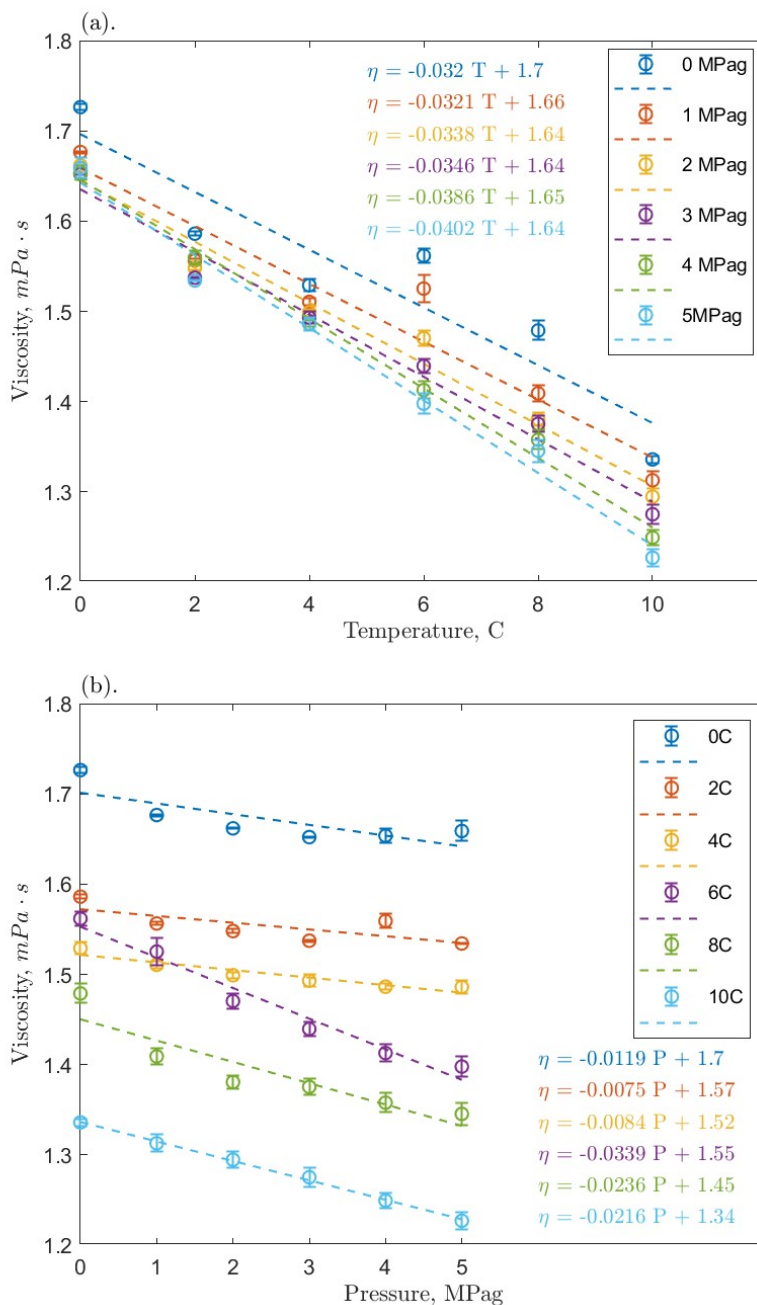

**Figure A1.** Effect on the measured viscosity of the 0.1 ppm O-MWCNT-methane-water system of (a) temperature and (b) pressure; error bars represent the 95% confidence intervals on the measured mean viscosity.

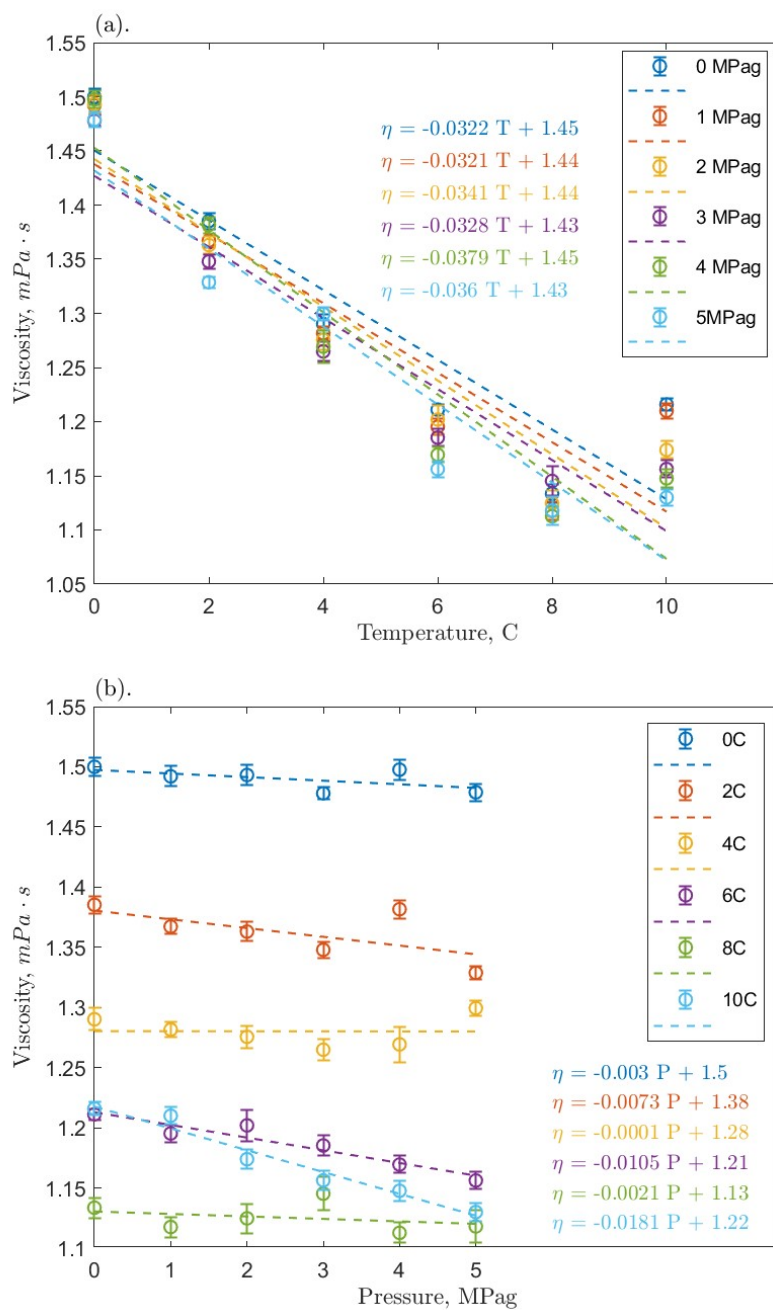

**Figure A2.** Effect on the measured viscosity of the 10 ppm O-MWCNT-methane-water system of (a) temperature and (b) pressure; error bars represent the 95% confidence intervals on the measured mean viscosity.

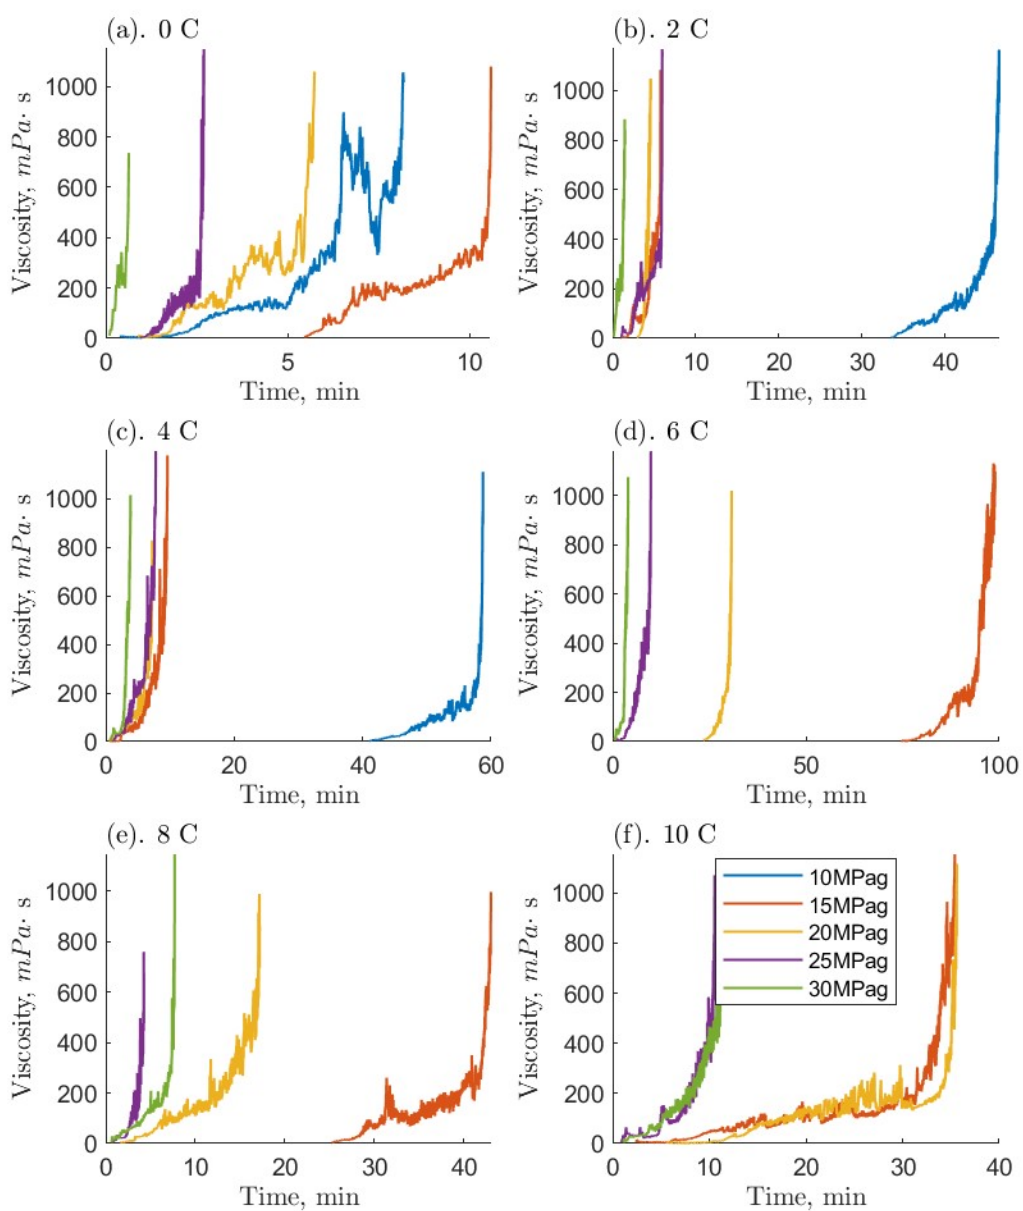

**Figure A3.** Measured temporal viscosities of the 0.1 ppm O-MWCNT-methane-water systems where hydrate formation occurred. Each subpanel (a-f) separates runs by temperature and contains isobaric viscosity time series starting at the onset of hydrate formation.

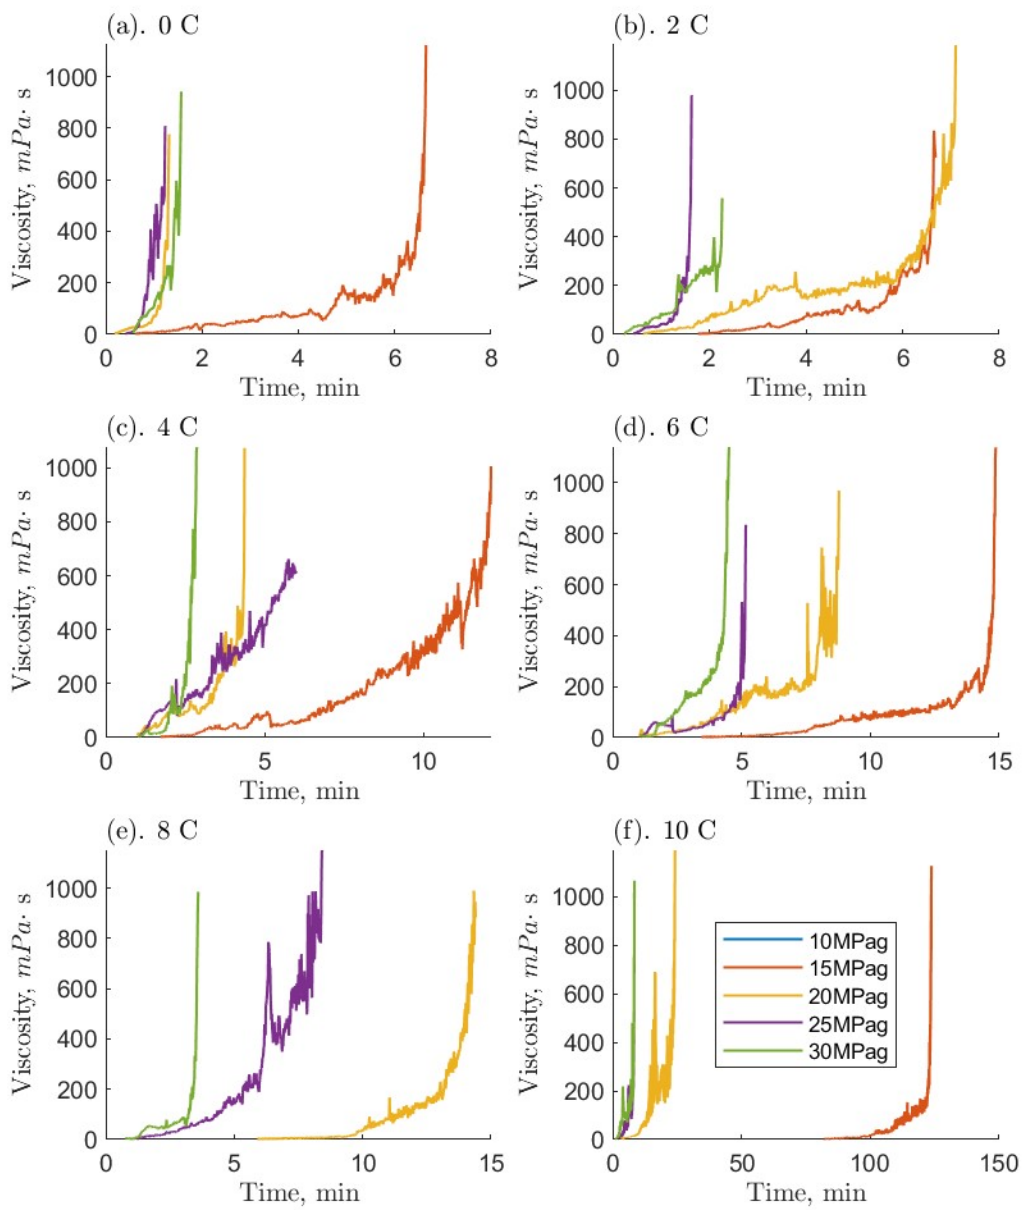

**Figure A4.** Measured temporal viscosities of the 10 ppm O-MWCNT-methane-water systems where hydrate formation occurred. Each subpanel (a-f) separates runs by temperature and contains isobaric viscosity time series starting at the onset of hydrate formation.

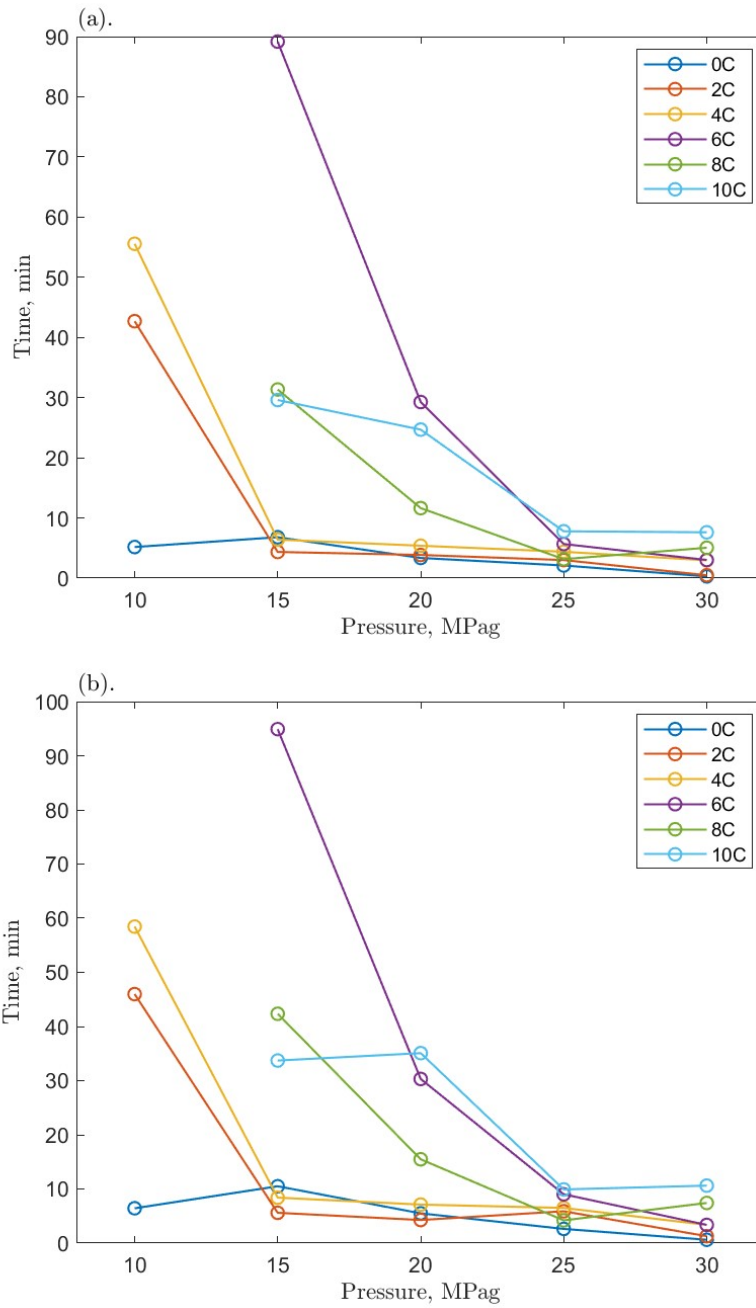

**Figure A5.** The time required for the 0.1 ppm O-MWCNT-methane-water system to reach (a) 200 mPa·s and (b) 500 mPa·s from the onset of hydrate formation at various pressures.

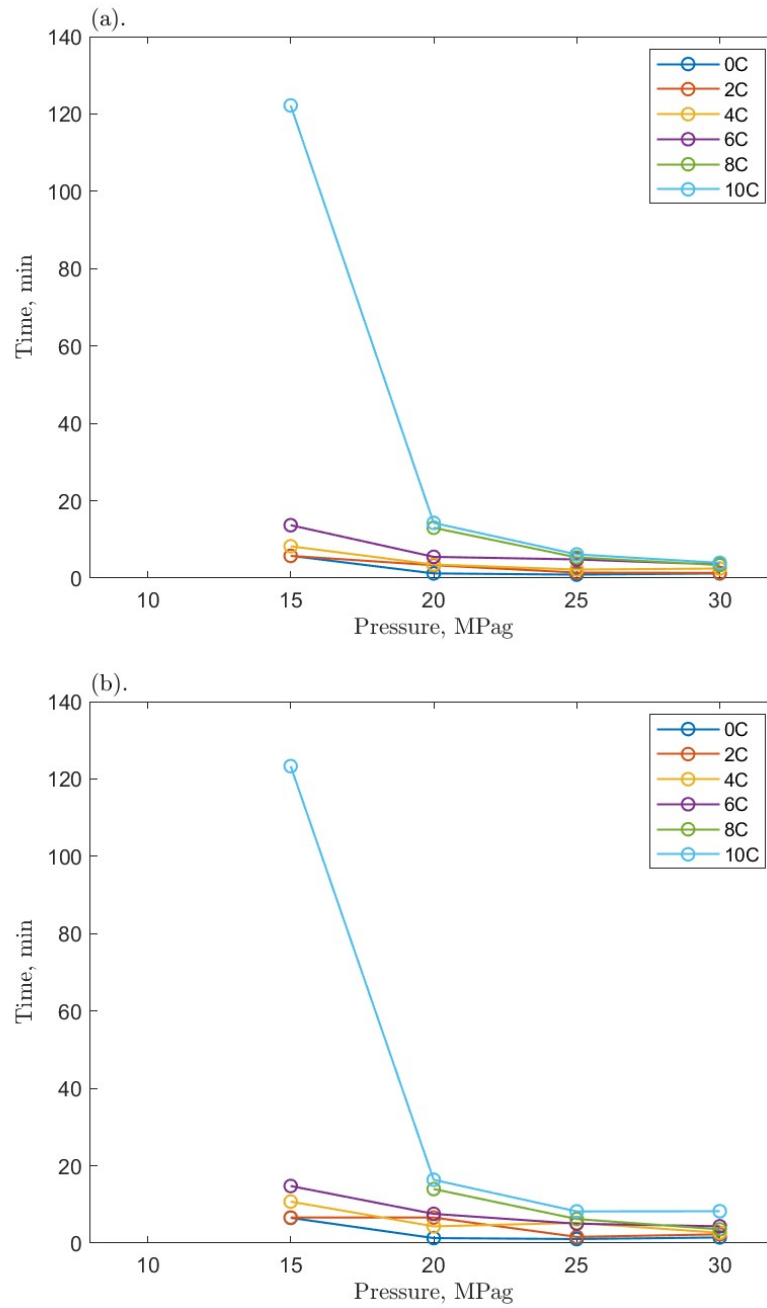

**Figure A6.** The time required for the 10 ppm O-MWCNT-methane-water system to reach (a) 200 mPa·s and (b) 500 mPa·s from the onset of hydrate formation at various pressures.
